# Supplementary material
Source: PubMed Central journal article supplement (PMC7238384)
Supplement: SupplementalMaterial9.pdf [file SupplementalMaterial9.pdf]

Results from univariate analysis:

A. Predictors of collateral grade

| <b>Predictor</b>                 | <b>Odds Ratio</b> | <b>LCL</b> | <b>UCL</b> | <b>p-value</b> |
|----------------------------------|-------------------|------------|------------|----------------|
| Age (per year)                   | 1.01              | 0.97       | 1.05       | 0.627          |
| NIHSS at baseline (per point)    | 1.04              | 0.95       | 1.14       | 0.410          |
| Baseline infarct volume (per ml) | 1.04              | 1.01       | 1.06       | 0.003          |
| Time to groin puncture (per min) | 1.00              | 0.99       | 1.00       | 0.224          |
| Propofol dose (per mg)           | 1.00              | 1.00       | 1.00       | 0.580          |
| Phenylephrine dose (per mg)      | 1.02              | 0.88       | 1.19       | 0.778          |
| MAP < 70 (yes vs no)             | 2.86              | 1.01       | 8.10       | 0.048          |

B. Predictors of infarct growth

| <b>Predictor</b>                 | <b>Estimate</b> | <b>LCL</b> | <b>UCL</b> | <b>p-value</b> |
|----------------------------------|-----------------|------------|------------|----------------|
| Age (per year)                   | 0.80            | -0.54      | 2.13       | 0.245          |
| NIHSS at baseline (per point)    | 3.23            | -0.26      | 6.72       | 0.072          |
| Baseline infarct volume (per ml) | 0.93            | 0.10       | 1.75       | 0.030          |
| Time to groin puncture (per min) | 0.12            | -0.08      | 0.33       | 0.233          |
| Propofol dose (per mg)           | 0.02            | -0.05      | 0.10       | 0.509          |
| Phenylephrine dose (per mg)      | 6.78            | 1.46       | 2.11       | 0.014          |
| MAP < 70 (yes vs no)             | -21.38          | -55.84     | 13.08      | 0.226          |
